# Supplementary material
Source: PubMed Central journal article supplement (PMC5710370)
Supplement: jamapediatr-171-1063-s002.pdf [file jamapediatr-171-1063-s002.pdf]

## Supplementary Online Content

Hosek SG, Landovitz RJ, Kapogiannis B, et al. Safety and feasibility of antiretroviral preexposure prophylaxis for adolescent men who have sex with men aged 15 to 17 years in the United States. *JAMA Pediatr*. Published online September 5, 2017. doi:10.1001/jamapediatrics.2017.2007

**eTable.** Sexual Risk Behaviors by Study Visit—Median and Interquartile Range

This supplementary material has been provided by the authors to give readers additional information about their work.

**eTable. Sexual Risk Behaviors by Study Visit – Median and Interquartile Range**

| Sexual Risk Behavior                                                                                              | Study Visit |           |           |           |           |           |           | p-value <sup>1</sup> |
|-------------------------------------------------------------------------------------------------------------------|-------------|-----------|-----------|-----------|-----------|-----------|-----------|----------------------|
|                                                                                                                   | Baseline    | 4         | 8         | 12        | 24        | 36        | 48        |                      |
| During the past month, how many male partners have you had sexual contact with (oral or anal)?                    | 1.0 (2.0)   | 1.0 (2.0) | 1.0 (2.0) | 1.0 (2.0) | 1.0 (2.0) | 1.0 (1.0) | 1.0 (2.0) | 0.08                 |
| Of the times you had receptive anal sex with a partner in the last month, how many times did he NOT use a condom? | 1.0 (2.0)   | 1.0 (2.0) | 0.0 (2.0) | 1.0 (2.5) | 0.0 (3.0) | 1.0 (8.0) | 0.0 (2.0) | 0.16                 |
